RESEARCH ARTICLE

# *In-Utero* Low-Dose Irradiation Leads to Persistent Alterations in the Mouse Heart Proteome

Mayur V. Bakshi<sup>1</sup>, Omid Azimzadeh<sup>1</sup>, Juliane Merl-Pham<sup>2</sup>, Tine Verreet<sup>4,5</sup>, Stefanie M. Hauck<sup>2</sup>, Mohammed A. Benotmane<sup>4</sup>, Michael J. Atkinson<sup>1,3</sup>, Soile Tapio<sup>1\*</sup>

**1** Helmholtz Zentrum München, German Research Center for Environmental Health GmbH, Institute of Radiation Biology, D-85764 Neuherberg, Germany, **2** Helmholtz Zentrum München, German Research Center for Environmental Health GmbH, Research Unit Protein Science, D-80939 Munich, Germany, **3** Chair of Radiation Biology, Technical University of Munich, D-80333 Munich, Germany, **4** Radiobiology Unit, Belgian Nuclear Research Centre, SCK-CEN, B-2400 Mol, Belgium, **5** Laboratory of Neural Circuit Development and Regeneration, Animal Physiology and Neurobiology Section, Department of Biology, KU Leuven, B-3000 Leuven, Belgium

\* [soile.tapio@helmholtz-muenchen.de](mailto:soile.tapio@helmholtz-muenchen.de)

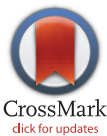

**OPEN ACCESS**

**Citation:** Bakshi MV, Azimzadeh O, Merl-Pham J, Verreet T, Hauck SM, Benotmane MA, et al. (2016) *In-Utero* Low-Dose Irradiation Leads to Persistent Alterations in the Mouse Heart Proteome. PLoS ONE 11(6): e0156952. doi:10.1371/journal.pone.0156952

**Editor:** Nukhet Aykin-Burns, University of Arkansas for Medical Sciences; College of Pharmacy, UNITED STATES

**Received:** January 15, 2016

**Accepted:** May 23, 2016

**Published:** June 8, 2016

**Copyright:** © 2016 Bakshi et al. This is an open access article distributed under the terms of the [Creative Commons Attribution License](https://creativecommons.org/licenses/by/4.0/), which permits unrestricted use, distribution, and reproduction in any medium, provided the original author and source are credited.

**Data Availability Statement:** The raw data files from the mass spectrometry analysis have been deposited under the following link: [http://storedb.org/store\\_v3/study.jsp?studyId=1019](http://storedb.org/store_v3/study.jsp?studyId=1019).

**Funding:** The research leading to these results is supported by a grant from the European Community's Seventh Framework Program (EURATOM), Contract No. 295823 (PROCARDIO) and Contract No. 295552 (CEREBRAD). The funders had no role in study design, data collection and analysis, decision to publish, or preparation of the manuscript.

## Abstract

Prenatal exposure to stress such as increased level of reactive oxygen species or antiviral therapy are known factors leading to adult heart defects. The risks following a radiation exposure during fetal period are unknown, as are the mechanisms of any potential cardiac damage. The aim of this study was to gather evidence for possible damage by investigating long-term changes in the mouse heart proteome after prenatal exposure to low and moderate radiation doses. Pregnant C57Bl/6J mice received on embryonic day 11 (E11) a single total body dose of ionizing radiation that ranged from 0.02 Gy to 1.0 Gy. The offspring were sacrificed at the age of 6 months or 2 years. Quantitative proteomic analysis of heart tissue was performed using Isotope Coded Protein Label technology and tandem mass spectrometry. The proteomics data were analyzed by bioinformatics and key changes were validated by immunoblotting. Persistent changes were observed in the expression of proteins representing mitochondrial respiratory complexes, redox and heat shock response, and the cytoskeleton, even at the low dose of 0.1 Gy. The level of total and active form of the kinase MAP4K4 that is essential for the embryonic development of mouse heart was persistently decreased at the radiation dose of 1.0 Gy. This study provides the first insight into the molecular mechanisms of cardiac impairment induced by ionizing radiation exposure during the prenatal period.

## Introduction

Ionizing radiation is now recognized as a risk factor for cardiovascular disease [1]. It is suggested that children may be more susceptible to future radiation-induced heart impairment than adults [2]. Given the well-documented association between prenatal radiation exposure

**Competing Interests:** The authors have declared that no competing interests exist.

**Abbreviations:** Gy, Gray; IPA, Ingenuity Pathway Analysis; H/L, heavy to light ratio; ICPL, isotope coded protein label; LC-MS, liquid chromatography mass spectrometry.

and both childhood cancer [3] and developmental impairments [4,5], the incidence of hypertension, hypercholesterolemia and cardiovascular disease was investigated in atomic bomb survivors exposed *in utero* [6]. Although no significant excess in the risk for cardiovascular disease was found, there was a suggestion of an increased risk when fatal and nonfatal cardiovascular disease cases were combined. This study has statistical limitations due to the low number (506) of *in-utero* exposed subjects studied and their relatively young age (under 60 years) at the time of examination [6].

The embryonic development of the murine fetal heart is a very dynamic process as the typical gestation period only lasts three weeks. A particular window of susceptibility extends from embryonic day E9 to E12. When corrected for size and embryonic time scale, the anatomy and growth of mouse and human hearts are quite similar [7], suggesting that mouse models can be successfully used to study the heart development.

The activation of the MAP kinase cascade plays an important role in the heart chamber formation of the fetus [8]. Data from human studies suggest that environmental stress factors such as hypoxia, increased level of reactive oxygen species or antiviral therapy adversely influence this process [9,10]. It is reasonable to suggest that ionizing radiation may have similar adverse effects on the fetal heart development. However, no experimental data concerning radiation-induced cardiac defects after prenatal exposure are available at the moment.

The aim of this study was to evaluate the long-term consequences of low and moderate *in-utero* (E11) radiation doses using the C57Bl/6J mouse model. The lowest radiation dose used here is comparable to that received in coronary computed tomography angiogram (20 mGy). The higher doses of 0.1 and 1.0 Gy have been measured in accidental and occupational situations, even in females [6,11]. Both male and female offspring were included in the study. A global quantitative proteomics analysis with a liquid chromatography-tandem mass spectrometry (LC-MS/MS) identification of dysregulated proteins was performed. Proteins altered in expression could be clustered to several categories including mitochondrial, acute phase and structural proteins. Significant proteome alterations were detectable two years post-irradiation even after exposure to a dose of 0.1 Gy.

## Materials and Methods

### *In-utero* irradiation

All animal experiments were performed in accordance with the European Communities Council Directive of November 24, 1986 (86/609/EEC) and approved by the local ethical board Studecentrum voor Kernenergie-Centre d'Étude de l'énergie Nucléaire/Vlaamse Instelling voor Technologisch Onderzoek (SCK-CEN/VITO) (ref. 02–012). C57Bl/6J were purchased from Janvier (Bio-services, Uden, The Netherlands) and housed under standard laboratory conditions (12 h light/dark cycle). Mice were mated during a 2-hour time period in the morning, at the start of the light phase (7.30 h until 9.30 h), in order to ensure synchronous timing of embryonic development. Subsequently, pregnant females were whole body irradiated at E11 (0.02/0.05, 0.1 and 1.0 Gy) at a dose rate of 0.35 Gy/min using a Pantak RX tube operating at 250 kV, 15 mA (1 mm Cu-filtered X-rays). The calibration of the X-ray tube was performed using an ionization chamber. Control pregnant females were sham-irradiated. The overall health of the mice was monitored weekly. No adverse health consequences were observed in the irradiated mice. All mice were sacrificed via cervical dislocation, the male offspring after 6 months and the female offspring 2 years after birth. Hearts were excised and maintained at -80°C until further analysis. The time points referred to in this paper (6 m, 2 y) are calculated from the birth, not from the irradiation.

## Isolation of total heart protein

The frozen hearts were pulverized in liquid nitrogen using mortar and pestle. The powdered tissue was immediately suspended in 6 M guanidine hydrochloride (SERVA) with phosphatase and protease inhibitor cocktails (Roche). The samples were centrifuged at 13,000 g and the supernatants were collected. Protein concentration of each supernatant was measured with Bradford assay [12].

## ICPL labeling

Fifty (50) µg of protein from each supernatant was labeled with Isotope Coded Protein Label (ICPL) technology. Triplex set of labels (light, medium and heavy) were used as follows: control was labeled with light labels while irradiated heart proteomes (0.02/0.05 Gy, 0.1 Gy) were labeled with medium and heavy isotopes as described previously [13]. Duplex set of labels was used for the dose of 1.0 Gy: control was labeled with a light label and the irradiated sample with a heavy label. Three biological replicates were used for each dose and for the respective control groups. The labeled proteins were mixed, precipitated and dissolved in Laemmli sample buffer [14]. The proteins were separated by SDS-PAGE gel electrophoresis and stained using Coomassie Blue.

## Mass spectrometric analysis

Mass spectrometric analysis was done as described previously [15]. Shortly, the Coomassie Blue stained protein lanes were cut into 5 slices and individually in-gel digested with trypsin (Sigma Aldrich). The digested peptides were fractionated on nano-HPLC and subsequently analyzed with an Orbitrap-XL mass spectrometer (Thermo Scientific) as described previously [16].

The MS/MS spectra were searched against the Ensembl mouse database (Version: 2.4, 56 416 sequences) using the Mascot search engine (version 2.3.02; Matrix Science) with the following parameters: a precursor mass error tolerance of 10 ppm and a fragment tolerance of 0.6 D. One missed cleavage was allowed. Carbamidomethylation was set as the fixed modification. Oxidized methionine and ICPL-0, ICPL-4 and ICPL-6 for lysine residues and N-termini of peptides were set as the variable modifications.

Data processing for the identification and quantitation of ICPL-triplex labeled proteins was performed using Proteome Discoverer version 1.3.0.339 (Thermo Scientific). The MASCOT Percolator node-based algorithm was used to discriminate correct from incorrect peptide spectrum matches. The q value of the percolator algorithm was set to 0.01 representing strict peptide ranking. Thus, only the best ranked peptides were used. Further, these peptides were filtered against a Decoy database resulting in a false discovery rate (FDR) of each LC-MS-run; the significance threshold of the FDR was set to 0.01 to ensure that only highly confident peptides were used for protein quantification [17]. Proteins identified by at least two unique peptides in two out of three biological replicates, and having an H/L variability of less than 30% were considered for further evaluation. Proteins identified by a single peptide were manually scrutinized and regarded as unequivocally identified if they fulfilled the following four criteria: (a) they had fragmentation spectra with a long, nearly complete y- and/or b-series; (b) all lysines were modified; (c) the numbers of lysines predicted from the mass difference of the labeled pair matched the number of lysines in the given sequence from the search query and (d) at least one mass of a modified lysine was included in the detected partial fragment series [18]. Proteins with ratios of H/L label greater than 1.30-fold or less than 0.769-fold were defined as being significantly differentially expressed.

## Access to raw data files from LC-MS/MS runs

The raw data files from the mass spectrometry analysis have been deposited under the following link-[http://storedb.org/store\\_v3/study.jsp?studyId=1019](http://storedb.org/store_v3/study.jsp?studyId=1019)

## Bioinformatics analysis

Protein-protein interactions and signaling networks were searched using INGENUITY Pathway Analysis (IPA) (<http://www.INGENUITY.com>) [19] and STRING protein database (<http://string-db.org>) [20]. The Ensembl protein accession numbers, including the relative expression values of all significantly deregulated proteins, were uploaded to IPA and STRING to elucidate possible interactions.

## Immunoblotting analysis

Immunoblotting of protein lysates from control and irradiated tissues was performed as described [21]. In short, proteins were separated using 1D gel electrophoresis and transferred to nitrocellulose membranes (GE Healthcare) using a TE 77 semidry blotting system (GE Healthcare) at 0.8 mA/cm for 1 h. Membranes were saturated for one hour with 8% milk powder in TBS (50 mM Tris-HCl, pH 7.6 and 150 mM NaCl) containing 0.1% Tween 20 (TBS/T). Blots were incubated overnight at 4°C with antibodies against vimentin (Abcam ab92547), LIM domain-binding protein 3 (Abcam ab154183), peroxiredoxin-5 (Abcam ab119712), apolipoprotein E (Abcam ab1906) and phospho Map4K4-ser801 (BioSource bs-5493R).

After washing three times in TBS/T, blots were incubated for one hour at room temperature with horseradish peroxidase-conjugated or alkaline phosphatase anti-mouse or anti-rabbit secondary antibody (Santa Cruz Biotechnology) in blocking buffer (TBS/T with 8% w/v milk powder). Immuno-detection was performed with ECL advance Western blotting detection kit (GE Healthcare). The protein bands were quantified using Total Lab (TL100) software (<http://www.totallab.com>). ATP synthase  $\beta$  (Abcam ab14730) was used for normalization as it showed no significant change in the proteomics analysis.

## MAP4K4 ELISA assay

To test the amount of total MAP4K4 same amount of protein (100  $\mu$ g) from each sample was used for the enzyme-linked immunosorbent assay (ELISA) assay that was performed according to manufacturer's guidelines (MyBioSource MBS9317805).

## Statistical analysis

Statistical analysis was performed using Graph Pad Prism (release 4). Immunoblotting results were evaluated using non-paired Student's t-test. Data are presented as means + standard deviation (SD). A p-value of less than 0.05 was considered to denote statistical significance. Three biological replicates were used in all experiments.

## Results

### Proteome alteration increases with the radiation dose

The proteomic analysis at 6 months using male offspring identified a total of 1196 proteins (682 quantified) of which 19 (1.6%) and 29 proteins (2.4%) were significantly deregulated at 0.02 Gy and 0.1 Gy, respectively (Tables A and B in [S2 File](#)). At 6 months, the number of identified proteins after 1.0 Gy was 1188 (644 quantified) of which 34 proteins (2.9%) were significantly deregulated (Table C in [S2 File](#)). The protein expression changes induced at the lowest

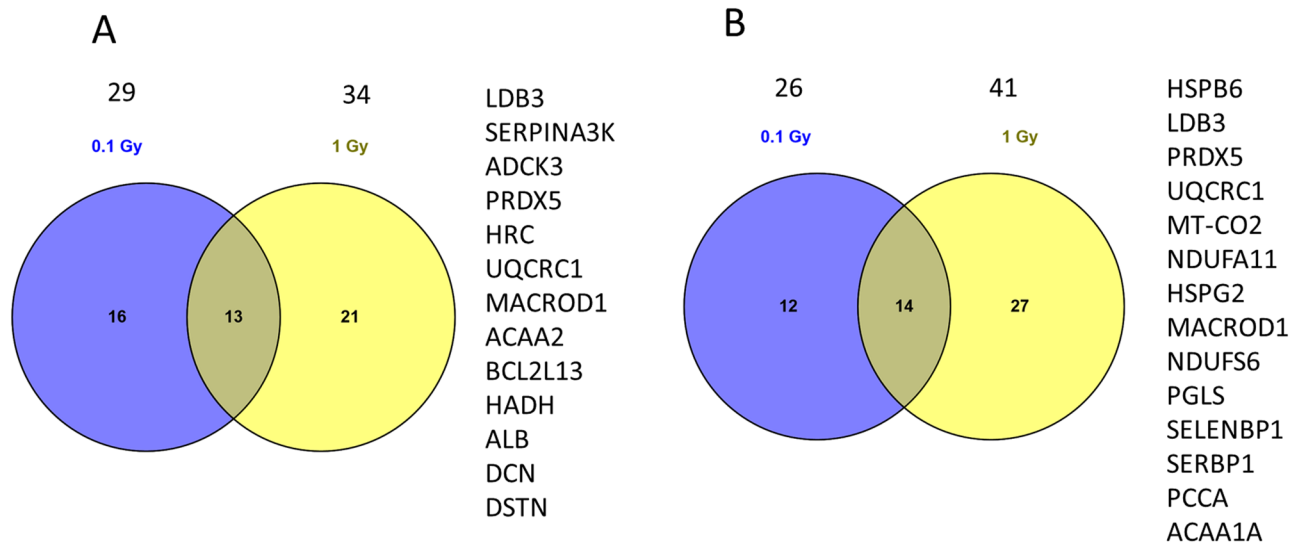

**Fig 1. Venn diagrams showing the number of all and shared deregulated proteins at doses of 0.1 Gy and 1.0 Gy.** (A) The numbers of deregulated proteins at 6 months and (B) 2 years are indicated above the circles. The list of shared proteins at these time points is shown on the right.

doi:10.1371/journal.pone.0156952.g001

dose (0.02 Gy) showed little overlap with those seen at the higher doses with only seven proteins shared with the deregulated proteins at the dose of 0.1 Gy or 1.0 Gy. However, thirteen significantly deregulated proteins were shared between 0.1 Gy and 1.0 Gy doses, including peroxiredoxin 5 (PRDX5), LIM domain-binding protein-3 (LDB3), and several mitochondrial proteins (Fig 1A).

As only a few proteome alterations were seen at the dose of 0.02 Gy, the effect of a slightly higher but still a low radiation dose (0.05 Gy) was investigated at a later time point (2 years). To estimate the effect of the gender in the radiation response female offspring was used at this time point. The proteomics analysis at 0.05 Gy and 0.1 Gy identified a total of 983 proteins (528 quantified) of which 11 (1.1%) and 26 proteins (2.7%) were significantly deregulated, respectively (Tables D and E in S2 File). At the 1.0 Gy dose 2 years post-irradiation, 988 proteins were identified (582 quantified), of which 41 proteins (4.2%) were significantly deregulated (Table F in S2 File). Again, the proteome response at the lowest dose was distinct from that of the higher doses with only six deregulated proteins shared with 0.1 Gy or 1.0 Gy. In contrast, the higher doses induced similar changes in the heart proteome. Fourteen significantly deregulated proteins were shared between these doses (Fig 1B). These included PRDX5, LDB3, heat shock protein HSPB6, and several mitochondrial proteins.

The proteome alteration at the highest dose (1.0 Gy) was investigated as a function of time. Ten deregulated proteins were found shared at 6 months and 2 years (Table 1), indicating a similar response in male and female mice. Members of mitochondrial complexes I and III, and hydroxyacyl-Coenzyme A dehydrogenase (HADH), involved in acetyl-CoA pathway, were found upregulated. Similarly, HSBP6, PRDX5, and LDB3 were upregulated whereas the structural protein vimentin (VIM) and the lipid translocator apolipoprotein E (APOE) were found downregulated (Table 1). With the exception of transgelin 2 (TAGLN2), an actin binding protein and a marker of differentiated smooth muscle [22], all shared proteins showed a similar direction of deregulation at the two time points. All differentially regulated proteins showed a greater fold change in expression at 2 years than at 6 months, suggesting a progressive proteome alteration.

**Table 1. Significantly deregulated proteins after 1.0 Gy *in-utero* dose common to time points of 6 months and 2 years.**

| Protein name                                     | Fold change |     | Function                                    |
|--------------------------------------------------|-------------|-----|---------------------------------------------|
|                                                  | 6 m         | 2 y |                                             |
| Heat shock protein, alpha-crystallin-related, B6 | 2.3         | 3.7 | Cardiac apoptosis                           |
| LIM-domain binding protein 3                     | 2.2         | 2.4 | Developmentally regulated in cardiac muscle |
| Peroxiredoxin 5                                  | 1.8         | 2.0 | Response to mitochondrial oxidative stress  |
| Hydroxyacyl-Coenzyme A dehydrogenase             | 1.6         | 1.7 | Acetyl-CoA pathway                          |
| MACRO domain containing 1                        | 1.5         | 1.7 | Ribose deacetylase                          |
| Ubiquinol-cytochrome c reductase core protein 1  | 1.4         | 2.0 | Mitochondrial respiratory Complex III       |
| NADH dehydrogenase (ubiquinone) flavoprotein 2   | 1.3         | 1.4 | Mitochondrial respiratory Complex I         |
| Transgelin 2                                     | 0.7         | 1.4 | Marker of differentiated smooth muscle      |
| Vimentin                                         | 0.7         | 0.6 | Structural constituent                      |
| Apolipoprotein E                                 | 0.6         | 0.4 | Lipid transportation                        |

doi:10.1371/journal.pone.0156952.t001

Taken together, these data indicate a dose-dependent increase in the number of deregulated proteins at both time points. The proteome response at the lowest doses used here (0.02 Gy, 0.05 Gy) showed little similarity with that at the higher doses. Nevertheless, the protein LDB3 that is essential for the structure of sarcomeres was found upregulated at all doses and time points.

### Deregulated proteins form mitochondrial, acute phase, and structural protein clusters

Proteins, the expression of which was altered at the lowest radiation doses, i.e. 0.02 Gy and 0.05 Gy, (6 months and 2 years, respectively) could not be clustered to form an interactive network using STRING analysis. This suggested that no particular biological pathway was significantly affected at these doses.

Significantly deregulated proteins at doses of 0.1 Gy or 1.0 Gy could be clustered in categories as follows: mitochondrial proteins, acute phase response and structural proteins (cytoskeleton) (Fig 2). In most cases, the number of proteins in a particular network increased with dose at both time points, supporting a dose-dependent increase of proteome alterations that was also suggested by the proteomics analysis. In case of mitochondrial proteins, several members of the respiratory complexes I, III and IV showed persistent upregulation, ubiquinol-cytochrome c reductase (UQCRC1) being a central member of all networks. Although the networks of acute phase and structural proteins were represented as deregulated at both time points, the members of these networks changed in a time-dependent manner. For example, a transient deregulation was seen in the serpine family of proteins at 1.0 Gy at 6 months but not at 2 years. Some of these changes may also be due to a gender-specific alteration of the cardiac proteome.

### Immunoblotting confirms the results of the proteomic analysis

In order to validate the proteomics data, the expression of proteins representing the biological categories of cellular structure, metabolism or oxidative stress was investigated by immunoblotting (Fig 3). In agreement with the proteomics data, immunoblotting showed increase in the amount of LDB3 and PRDX5 whereas a decrease in the level of structural protein vimentin and lipid transporter APOE was observed after the 1.0 Gy dose at both time points (Figs A-D in S1 File).

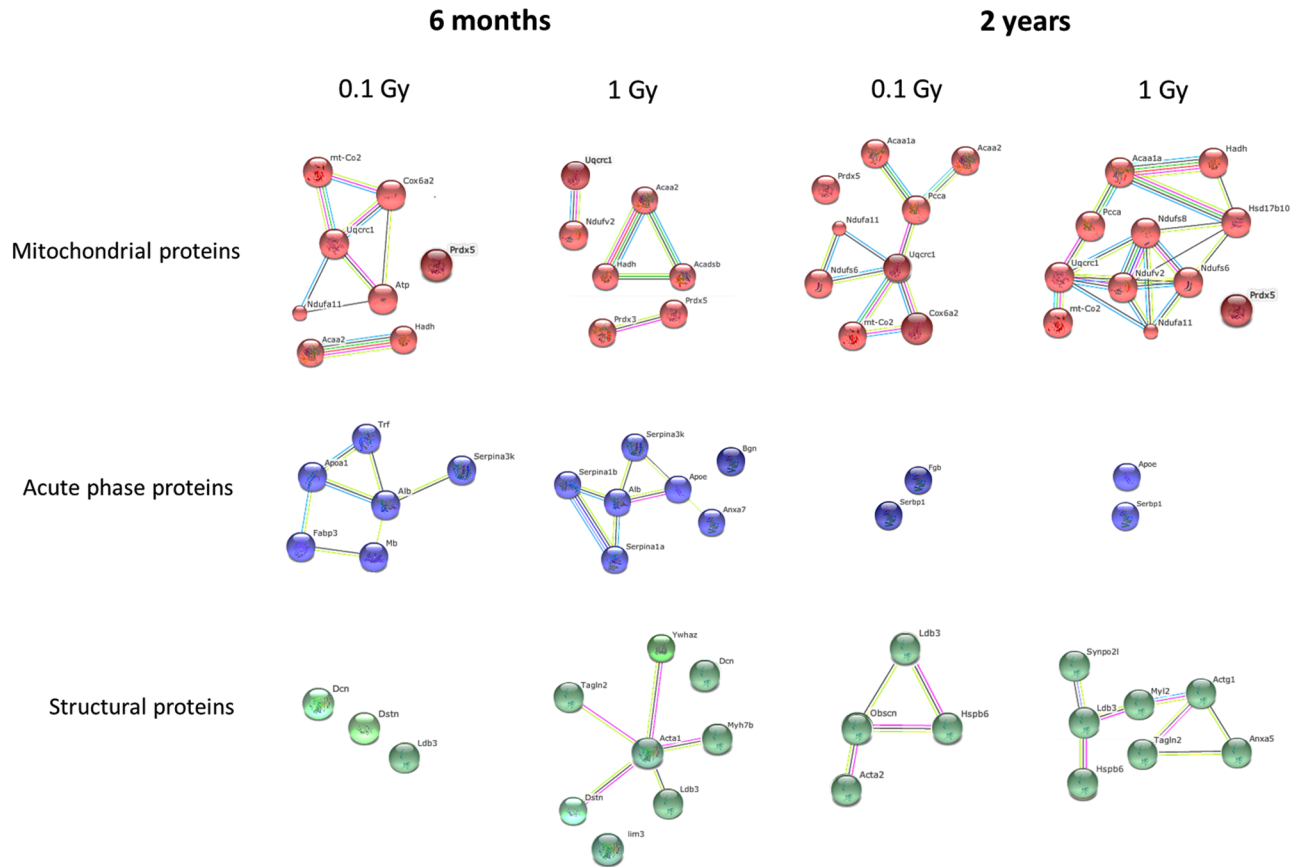

**Fig 2. STRING protein networks of significantly changed proteins at prenatal (E11) radiation exposure of 0.1 Gy and 1.0 Gy.** Common networks between 6-month- and 2-year-time points are shown. Mitochondrial proteins, acute phase proteins and structural proteins represent the major protein classes of proteins affected by the pre-natal irradiation.

doi:10.1371/journal.pone.0156952.g002

### Expressions of the total MAP4K4 and phospho-MAP4K4 are decreased after 1.0 Gy

Ingenuity Pathway Analysis (IPA) predicted the inhibition of mitogen-activated protein kinase kinase kinase 4 (MAP4K4) at 6 and 24 months after a dose of 1.0 Gy (Fig 4) but not at lower doses.

The relative quantification of the level of phosphorylated (active) MAP4K4 (Ser-801) using immunoblotting showed a significant decrease at 6 months (Fig 5A and Fig D in S1 File). At 2 years, the significance of downregulation was not reached ( $p = 0.1714$ ) (Fig 5A).

To confirm the predicted inhibition of MAP4K4, the total amount was measured using the control and 1.0 Gy irradiated cardiac tissue. A significant decrease in the level of total kinase expression was observed at both time points in irradiated hearts (Fig 5B).

### Discussion

There is a considerable lack of data concerning late effects of radiation-induced damage in the prenatal period. This study is to our knowledge the first to investigate persistent molecular changes in the murine heart after *in-utero* exposure to low and moderate doses of ionizing radiation. The doses used here, ranging from 0.02 to 1.0 Gy, are comparable to those found in medical diagnostic situations, atomic bombings and occupationally exposed populations [23,24].

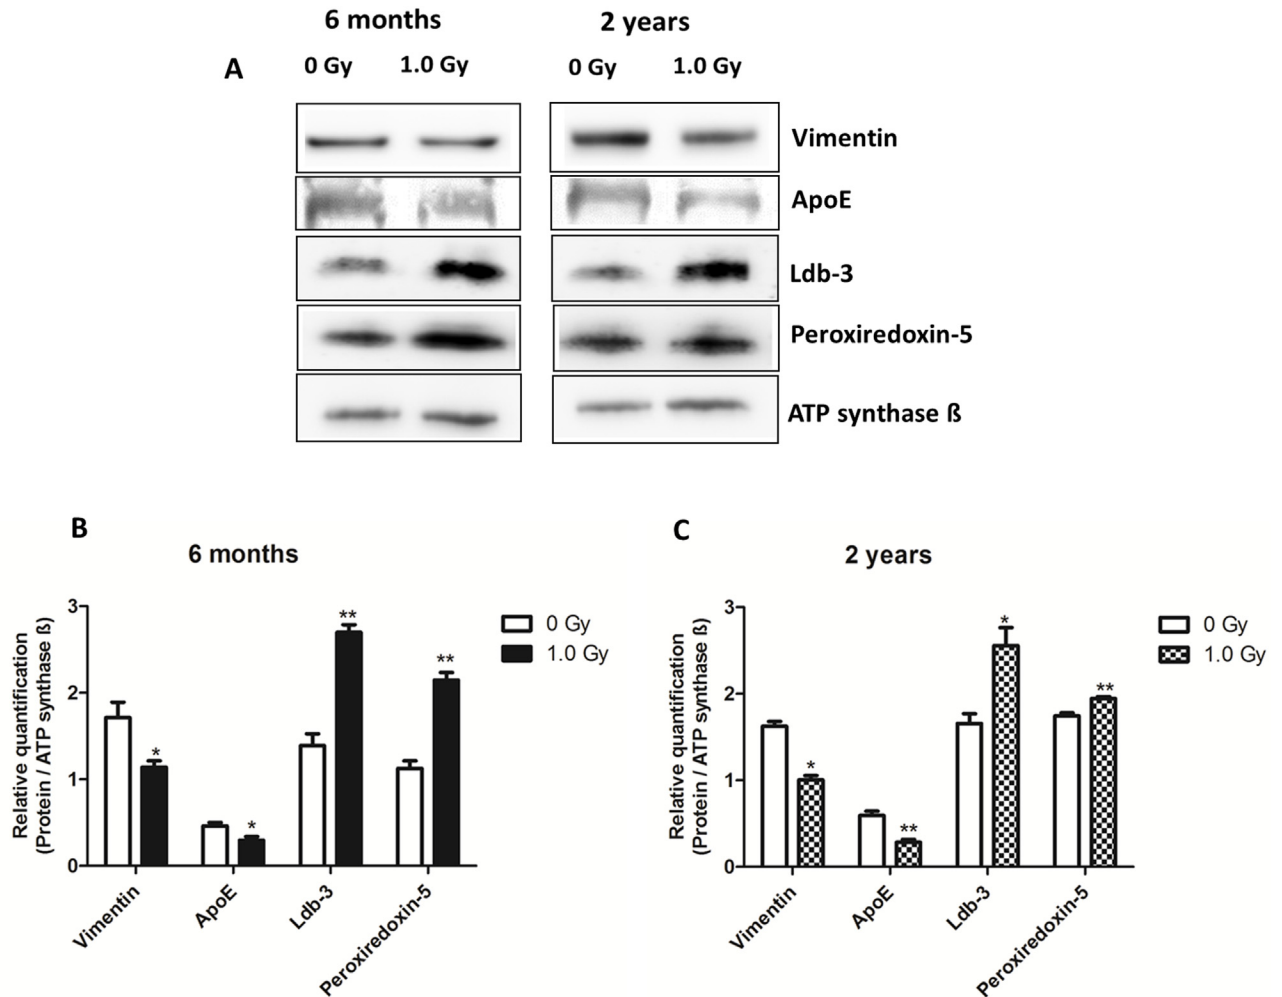

**Fig 3. Immunoblot validation of proteomics data at 1.0 Gy using antibodies against vimentin (VIM), apolipoprotein E (APOE), LIM domain-binding protein (LDB3), and peroxiredoxin 5 (PRDX5).** (A) The immunoblot images of VIM, APOE (6 months), PRDX5, and LDB3 are shown. The bar charts at 6 months (B) and 2 years (C) represent the average ratios with standard deviation (SD) of relative protein expression in control and 1.0 Gy irradiated samples after background correction and normalization to ATP synthase  $\beta$ . (unpaired Student's t-test; \* $p < 0.05$ ; \*\* $p < 0.01$ ;  $n = 3$ ).

doi:10.1371/journal.pone.0156952.g003

We show here that many mitochondrial proteins show differential expression after prenatal irradiation (E11) already at the dose of 0.1 Gy. Recent data strongly suggest that the switch to aerobic metabolism in the murine embryonic heart occurs around embryonic day E11.5 [25], close to the time point of irradiation in this study. It has been shown that at E9.5 mitochondrial electron transfer chain (ETC) activity and oxidative phosphorylation (OXPHOS) are not coupled, even though the complexes are present. At E11.5, mitochondria appear functionally more mature, ETC activity and OXPHOS are coupled and respond to ETC inhibitors [25]. The time window of OXPHOS activation may be especially susceptible to radiation-induced mitochondrial impairment. In this study, many members of respiratory Complexes I and IV are found differentially regulated after prenatal exposure, this being in agreement with the data following neonatal irradiation with same doses as used here [21]. In addition, upregulation of Complex III proteins is seen in this study. Our previous data on locally irradiated adult (8 weeks) mouse hearts (2 Gy) also highlight mitochondrial respiratory complexes as radiation targets in the



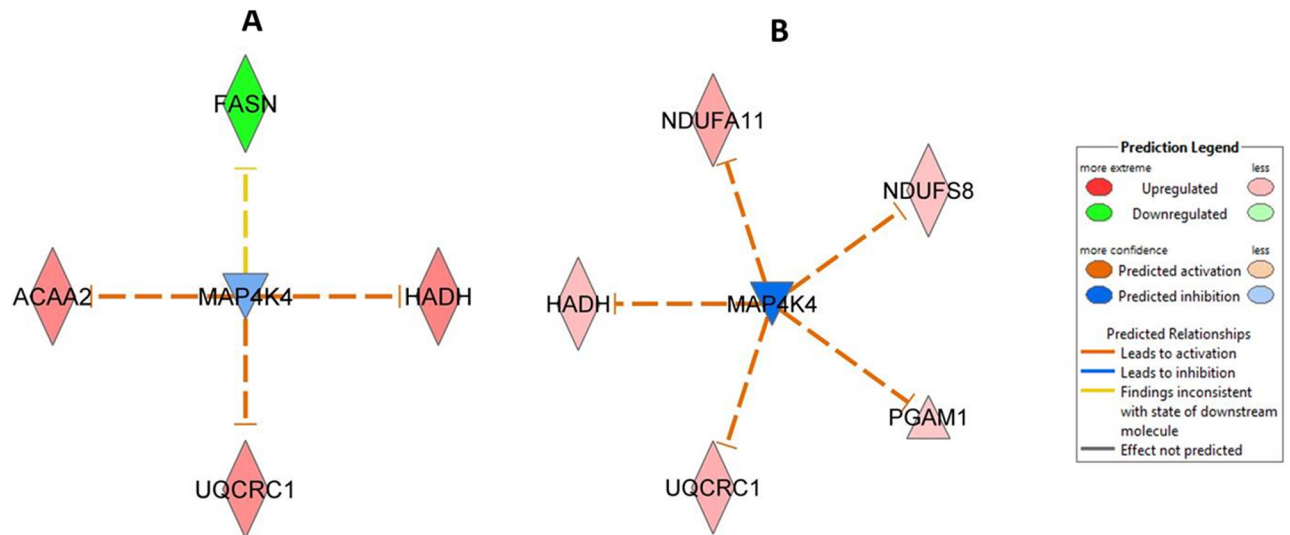

**Fig 4. Ingenuity Pathway Analysis networks showing predicted inhibition of protein kinase MAP4K4.** (A) Predicted networks after *in utero* irradiation at 1.0 Gy, 6 months and (B) 1.0 Gy, 2 year are shown. Three biological replicates were used in all experiments. ACAA2, acetyl-Coenzyme A acyltransferase 2; FASN, fatty acid synthase; HADH, hydroxyacyl-Coenzyme A dehydrogenase; UQCRC1, ubiquinol-cytochrome c reductase core protein 1; NDUFA11, NADH dehydrogenase (ubiquinone) 1 alpha subcomplex 11; NDUFS8, NADH dehydrogenase (ubiquinone) Fe-S protein 8; PGAM1, phosphoglycerate mutase 1; MAP4K4, Mitogen-activated protein kinase kinase kinase 4.

doi:10.1371/journal.pone.0156952.g004

heart but mice irradiated in the adulthood show downregulation, not upregulation, of the complex proteins [26]. This was connected with increased reactive oxygen species formation and protein oxidation, even 40 weeks after the radiation exposure [27]. The prenatal irradiation used here does not increase protein oxidation in the heart (data not shown) although the persistent upregulation of PRDX5 is indicative of long-term oxidative stress [28,29]. The upregulation of respiratory chain proteins may indicate a protective response to the early transient radiation insult [30].

A second group of significantly deregulated proteins found in this study are the heat shock proteins. Similar to mitochondrial proteins, the marked upregulation of heat shock protein B6 (HSPB6, formerly heat shock protein 20) that is observed at the 1.0 Gy dose already after 6 months and at all doses after 2 years, may indicate a response to persistent radiation-induced damage. HSPB6 plays a key role in protection against apoptosis, remodeling, and ischemia/reperfusion injury [31,32]. It has been implicated in modulation of cardiac contractility through sarcoplasmic reticulum calcium cycling [33].

Also involved in the cardiac contractility is the protein LDB3, also known as Cypher or Z-band alternatively spliced PDZ-motif (ZASP). It is the only protein found upregulated at all doses and time points. It stabilizes the cardiac sarcomere during contraction, through interactions with actin [34]. Mutations in LDB3 cause several forms of heart disease including dilated cardiomyopathy [35,36]. Another Z-disc protein, SYNPO2L, highly expressed in the mouse embryonic heart [37] and essential for heart function [38], is found almost twofold upregulated two years after the prenatal radiation dose of 1.0 Gy.

A transient deregulation (both up- and downregulation) at six months is seen of many members of the serpin family, especially at 1.0 Gy. The serpin family comprises a structurally similar, yet functionally diverse, set of proteins. Named originally for their function as serine proteinase inhibitors, many of its members are not inhibitors but rather chaperones, involved in cellular storage and transport [39]. An almost twofold upregulation is found at 1.0 Gy for

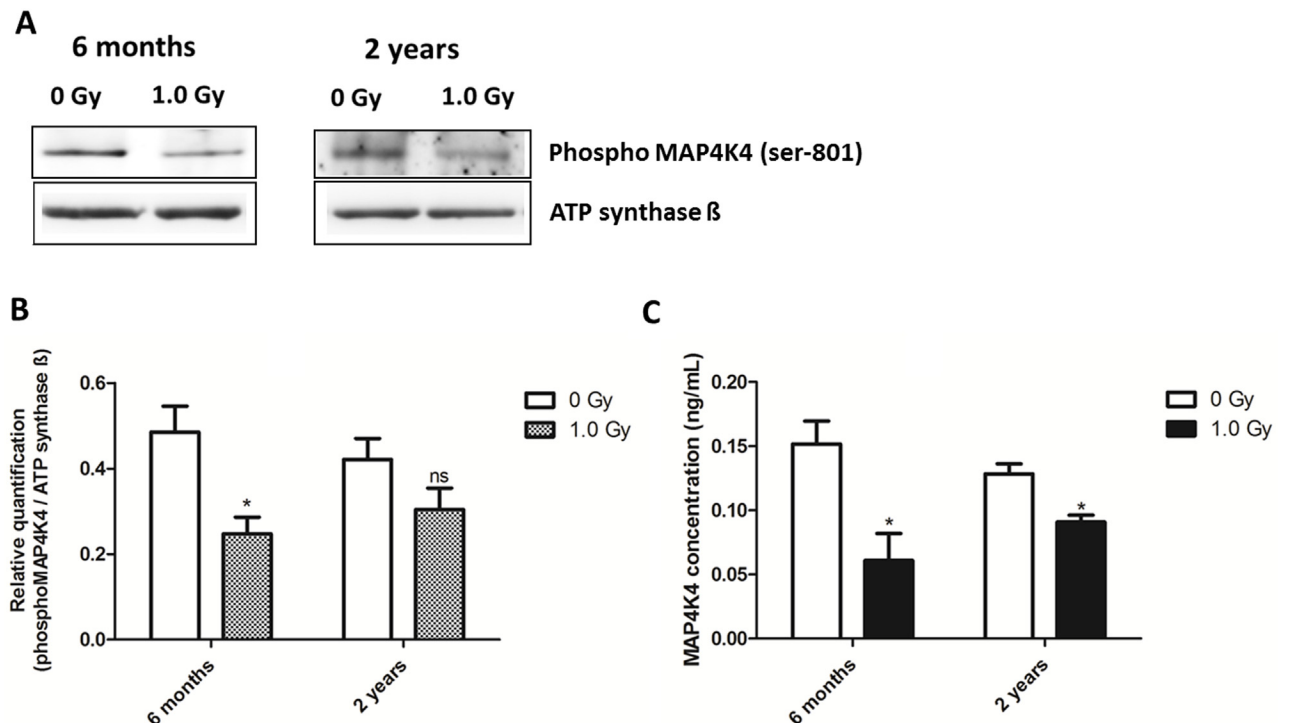

**Fig 5. Characterization of MAP4K4 in the control and 1.0 Gy-irradiated mouse heart.** (A) The immunoblot images of phospho-MAP4K4 (Ser-801) in the 1.0 Gy irradiated hearts compared to the controls at 6 months and 2 years is shown. (B) Columns represent the average ratios with standard deviation (SD) of relative protein expression in control and 1.0 Gy irradiated samples after background correction and normalization to ATP synthase  $\beta$  (unpaired Student's *t*-test; \* $p \leq 0.05$ ; ns, non-significant;  $n = 3$ ). (C) The total amount of MAP4K4 measured using ELISA in control and 1.0 Gy irradiated heart tissue shows significant radiation-induced decrease at 6 months and 2 years (unpaired Student's *t*-test; \* $p \leq 0.05$ ; ns, non-significant;  $n = 3$ ).

doi:10.1371/journal.pone.0156952.g005

the expression of SERPINA1A, alpha-1-antitrypsin orthologue, the deletion of which is embryonically lethal [40]. Alpha-1-antitrypsin expression has been associated with atherosclerosis progression in human [41].

An alteration of the cardiac cytoskeleton is suggested already at 0.1 Gy. The proteins from the structural component category such as annexin 5, transgelin (2 years), obscurin, and different forms of actin and myosin show increased expression. Obscurin plays a role in the formation of new sarcomeres during myofibril assembly [42] and mutations in this protein have been associated with dilated [43] and hypertrophic cardiomyopathy [44]. In contrast, downregulation of the vimentin expression was observed here, in accordance with our previous studies using adult mice [26,27].

APOE has an important function in the heart by facilitating the transport of high density lipoproteins (HDL) and low density lipoproteins (LDL) across the plasma membrane [45]. The downregulation of APOE observed at both time points (1.0 Gy) may suggest increased lipid accumulation [46] as previously shown at high doses of ionizing radiation to the heart [47].

This study shows that *in-utero* irradiation (1.0 Gy) decreases the expression of total and active form of MAP4K4 by reducing the phosphorylation of serine-801. MAP4K4, a serine/threonine protein kinase [48], is essential in embryonic mesoderm formation leading to the origin of the cardiovascular system [49]. The deletion of the corresponding gene is lethal as the k.o. mice die between E9.5 and E10.5. (Xue, Wang et al. 2001). Little is known of its function in the heart but several isoforms of this enzyme were identified recently in the rat cardiac kinome [50]. Its expression was higher in neonatal ventricular myocytes compared to the adult ones.

MAP4K4 may play a role in the response to environmental stress and inflammation as silencing it in macrophages *in vivo* protected mice from lipopolysaccharide-induced lethality by inhibiting TNF- $\alpha$  and interleukin-1 $\beta$  production [51]. The reduced amount of total and active form of MAP4K4 seen in this study may be protective against cardiac inflammation but more research is needed to clarify this.

As we find no great differences in the heart proteome responses of male and female mice, the gender-specific responses may be characteristic only to mice irradiated at a mature age. This is in agreement with our previous studies using both male and female mice that were irradiated early in life at postnatal day 10. These studies showed little difference in the hippocampal proteome after low and moderate doses of ionizing radiation [17,52].

## Conclusions

This study suggests that biological pathways important at the time of irradiation (E11) are still found altered years after the initial insult. Such pathways include initiation of mitochondrial respiration and activation of MAP kinases in the mouse embryonic heart. The proteomic response after prenatal irradiation is different from that observed after radiation exposure at the adult age but bears resemblance to that found after radiation exposure at the early postnatal phase. Several structural proteins found dysregulated in this study are involved in the sarcomere formation and contractility. Both of these processes are rapidly developing at the time of the radiation exposure.

## Supporting Information

**S1 File. Supplementary Figures.** Fig A: Images from immunoblotting of APOE and ATP synthase  $\beta$  in control and 1.0 Gy irradiated heart lysates at 6 months and 2 years. Fig B: Images from immunoblotting of PRDX5 and ATP synthase  $\beta$  in control and 1.0 Gy irradiated heart lysates at 6 months and 2 years. Fig C: Images from immunoblotting of LDB3 and ATP synthase  $\beta$  in control and 1.0 Gy irradiated heart lysates at 6 months and 2 years. Fig D: Images from immunoblotting of phospho-MAP4K4 (Ser-801), vimentin and ATP synthase  $\beta$  in control and 1.0 Gy irradiated heart lysates at 6 months and 2 years. (PDF)

**S2 File. Supplementary tables.** Table A: Significantly deregulated proteins at 0.02 Gy, 6 months. Table B: Significantly deregulated proteins at 0.1 Gy, 6 months. Table C: Significantly deregulated proteins at 1.0 Gy dose, 6 months. Table D: Significantly deregulated proteins list at 0.05 Gy, 2 years. Table E: Significantly deregulated proteins at 0.1 Gy, 2 years. Table F: Significantly deregulated proteins at 1.0 Gy, 2 years. (PDF)

## Acknowledgments

We thank Stefanie Winkler, Mieke Neefs, Liselotte Leysen and Sandra Helm for technical assistance.

## Author Contributions

Conceived and designed the experiments: MVB OA ST. Performed the experiments: MVB OA JMP. Analyzed the data: MVB OA ST. Contributed reagents/materials/analysis tools: TV SMH MAB. Wrote the paper: MVB OA MJA ST.

## References

1. Little MP, Azizova TV, Bazyka D, Bouffler SD, Cardis E, Chekin S, et al. Systematic review and meta-analysis of circulatory disease from exposure to low-level ionizing radiation and estimates of potential population mortality risks. *Environ Health Perspect* 2012; 120: 1503–1511. doi: [10.1289/ehp.1204982](https://doi.org/10.1289/ehp.1204982) PMID: [22728254](https://pubmed.ncbi.nlm.nih.gov/22728254/)
2. Armstrong GT, Liu Q, Yasui Y, Neglia JP, Leisenring W, Robison LL, et al. Late mortality among 5-year survivors of childhood cancer: a summary from the Childhood Cancer Survivor Study. *J Clin Oncol* 2009; 27: 2328–2338. doi: [10.1200/JCO.2008.21.1425](https://doi.org/10.1200/JCO.2008.21.1425) PMID: [19332714](https://pubmed.ncbi.nlm.nih.gov/19332714/)
3. Williams PM, Fletcher S. Health effects of prenatal radiation exposure. *Am Fam Physician* 2010; 82: 488–493. PMID: [20822083](https://pubmed.ncbi.nlm.nih.gov/20822083/)
4. Fattibene P, Mazzei F, Nuccetelli C, Risica S. Prenatal exposure to ionizing radiation: sources, effects and regulatory aspects. *Acta Paediatr* 1999; 88: 693–702. PMID: [10447122](https://pubmed.ncbi.nlm.nih.gov/10447122/)
5. Otake M, Schull WJ, Yoshimaru H. A review of forty-five years study of Hiroshima and Nagasaki atomic bomb survivors. Brain damage among the prenatally exposed. *J Radiat Res* 1991; 32 Suppl: 249–264. PMID: [1762113](https://pubmed.ncbi.nlm.nih.gov/1762113/)
6. Tatsukawa Y, Nakashima E, Yamada M, Funamoto S, Hida A, Akahoshi M, et al. Cardiovascular disease risk among atomic bomb survivors exposed in utero, 1978–2003. *Radiat Res* 2008; 170: 269–274. doi: [10.1667/RR1434.1](https://doi.org/10.1667/RR1434.1) PMID: [18763869](https://pubmed.ncbi.nlm.nih.gov/18763869/)
7. Wessels A, Sedmera D. Developmental anatomy of the heart: a tale of mice and man. *Physiol Genomics* 2003; 15: 165–176. PMID: [14612588](https://pubmed.ncbi.nlm.nih.gov/14612588/)
8. Rose BA, Force T, Wang Y. Mitogen-activated protein kinase signaling in the heart: angels versus demons in a heart-breaking tale. *Physiol Rev* 2010; 90: 1507–1546. doi: [10.1152/physrev.00054.2009](https://doi.org/10.1152/physrev.00054.2009) PMID: [20959622](https://pubmed.ncbi.nlm.nih.gov/20959622/)
9. Raddatz E, Gardier S, Sarre A. Physiopathology of the embryonic heart (with special emphasis on hypoxia and reoxygenation). *Ann Cardiol Angeiol (Paris)* 2006; 55: 79–89.
10. Chapple SJ, Puszyk WM, Mann GE. Keap1-Nrf2 regulated redox signaling in utero: Priming of disease susceptibility in offspring. *Free Radic Biol Med* 2015.
11. Azizova TV, Muirhead CR, Druzhinina MB, Grigoryeva ES, Vlasenko EV, Sumina MV, et al. Cardiovascular diseases in the cohort of workers first employed at Mayak PA in 1948–1958. *Radiat Res* 2010; 174: 155–168. doi: [10.1667/RR1789.1](https://doi.org/10.1667/RR1789.1) PMID: [20681782](https://pubmed.ncbi.nlm.nih.gov/20681782/)
12. Bradford MM. A rapid and sensitive method for the quantitation of microgram quantities of protein utilizing the principle of protein-dye binding. *Anal Biochem* 1976; 72: 248–254. PMID: [942051](https://pubmed.ncbi.nlm.nih.gov/942051/)
13. Yentrapalli R, Azimzadeh O, Barjaktarovic Z, Sarioglu H, Wojcik A, Harms-Ringdahl M, et al. Quantitative proteomic analysis reveals induction of premature senescence in human umbilical vein endothelial cells exposed to chronic low-dose rate gamma radiation. *Proteomics* 2013; 13: 1096–1107. doi: [10.1002/pmic.201200463](https://doi.org/10.1002/pmic.201200463) PMID: [23349028](https://pubmed.ncbi.nlm.nih.gov/23349028/)
14. Laemmli UK. Cleavage of structural proteins during the assembly of the head of bacteriophage T4. *Nature* 1970; 227: 680–685. PMID: [5432063](https://pubmed.ncbi.nlm.nih.gov/5432063/)
15. Bakshi MV, Azimzadeh O, Barjaktarovic Z, Kempf SJ, Merl-Pham J, Hauck SM, et al. Total body exposure to low-dose ionizing radiation induces long-term alterations to the liver proteome of neonatally exposed mice. *J Proteome Res* 2015; 14: 366–373. doi: [10.1021/pr500890n](https://doi.org/10.1021/pr500890n) PMID: [25299163](https://pubmed.ncbi.nlm.nih.gov/25299163/)
16. Hauck SM, Dietter J, Kramer RL, Hofmaier F, Zipplies JK, Amann B, et al. Deciphering membrane-associated molecular processes in target tissue of autoimmune uveitis by label-free quantitative mass spectrometry. *Mol Cell Proteomics* 2010; 9: 2292–2305. doi: [10.1074/mcp.M110.001073](https://doi.org/10.1074/mcp.M110.001073) PMID: [20601722](https://pubmed.ncbi.nlm.nih.gov/20601722/)
17. Kempf SJ, Casciati A, Buratovic S, Janik D, von Toerne C, Ueffing M, et al. The cognitive defects of neonatally irradiated mice are accompanied by changed synaptic plasticity, adult neurogenesis and neuroinflammation. *Mol Neurodegener* 2014; 9: 57. doi: [10.1186/1750-1326-9-57](https://doi.org/10.1186/1750-1326-9-57) PMID: [25515237](https://pubmed.ncbi.nlm.nih.gov/25515237/)
18. Sarioglu H, Brandner S, Jacobsen C, Meindl T, Schmidt A, Kellermann J, et al. Quantitative analysis of 2,3,7,8-tetrachlorodibenzo-p-dioxin-induced proteome alterations in 5L rat hepatoma cells using isotope-coded protein labels. *Proteomics* 2006; 6: 2407–2421. PMID: [16548065](https://pubmed.ncbi.nlm.nih.gov/16548065/)
19. Mayburd AL, Martinez A, Sackett D, Liu H, Shih J, Tauler J, et al. Ingenuity network-assisted transcription profiling: Identification of a new pharmacologic mechanism for MK886. *Clin Cancer Res* 2006; 12: 1820–1827. PMID: [16551867](https://pubmed.ncbi.nlm.nih.gov/16551867/)
20. Szklarczyk D, Franceschini A, Wyder S, Forslund K, Heller D, Huerta-Cepas J, et al. STRING v10: protein-protein interaction networks, integrated over the tree of life. *Nucleic Acids Res* 2015; 43: D447–452. doi: [10.1093/nar/gku1003](https://doi.org/10.1093/nar/gku1003) PMID: [25352553](https://pubmed.ncbi.nlm.nih.gov/25352553/)

21. Bakshi MV, Barjaktarovic Z, Azimzadeh O, Kempf SJ, Merl J, Hauck SM, et al. Long-term effects of acute low-dose ionizing radiation on the neonatal mouse heart: a proteomic study. *Radiat Environ Biophys* 2013 52; 451–461. doi: [10.1007/s00411-013-0483-8](https://doi.org/10.1007/s00411-013-0483-8) PMID: [23880982](https://pubmed.ncbi.nlm.nih.gov/23880982/)
22. Assinder SJ, Stanton JA, Prasad PD. Transgelin: an actin-binding protein and tumour suppressor. *Int J Biochem Cell Biol* 2009 41; 482–486. doi: [10.1016/j.biocel.2008.02.011](https://doi.org/10.1016/j.biocel.2008.02.011) PMID: [18378184](https://pubmed.ncbi.nlm.nih.gov/18378184/)
23. ICRP. Pregnancy and medical radiation. *Ann ICRP* 2000 30; iii–viii, 1–43. PMID: [11108925](https://pubmed.ncbi.nlm.nih.gov/11108925/)
24. ACOG. ACOG Committee Opinion. Number 299, September 2004 (replaces No. 158, September 1995). Guidelines for diagnostic imaging during pregnancy. *Obstet Gynecol* 2004 104; 647–651. PMID: [15339791](https://pubmed.ncbi.nlm.nih.gov/15339791/)
25. Beutner G, Eliseev RA, Porter GA Jr. Initiation of electron transport chain activity in the embryonic heart coincides with the activation of mitochondrial complex 1 and the formation of supercomplexes. *PLoS One* 2014 9; e113330. doi: [10.1371/journal.pone.0113330](https://doi.org/10.1371/journal.pone.0113330) PMID: [25427064](https://pubmed.ncbi.nlm.nih.gov/25427064/)
26. Barjaktarovic Z, Schmaltz D, Shyla A, Azimzadeh O, Schulz S, Haagen J, et al. Radiation-induced signaling results in mitochondrial impairment in mouse heart at 4 weeks after exposure to X-rays. *PLoS One* 2011 6; e27811. doi: [10.1371/journal.pone.0027811](https://doi.org/10.1371/journal.pone.0027811) PMID: [22174747](https://pubmed.ncbi.nlm.nih.gov/22174747/)
27. Barjaktarovic Z, Shyla A, Azimzadeh O, Schulz S, Haagen J, Dorr W, et al. Ionising radiation induces persistent alterations in the cardiac mitochondrial function of C57BL/6 mice 40 weeks after local heart exposure. *Radiother Oncol* 2013 106; 404–410. doi: [10.1016/j.radonc.2013.01.017](https://doi.org/10.1016/j.radonc.2013.01.017) PMID: [23522698](https://pubmed.ncbi.nlm.nih.gov/23522698/)
28. Zhou Y, Kok KH, Chun AC, Wong CM, Wu HW, Lin MC, et al. Mouse peroxiredoxin V is a thioredoxin peroxidase that inhibits p53-induced apoptosis. *Biochem Biophys Res Commun* 2000 268; 921–927. PMID: [10679306](https://pubmed.ncbi.nlm.nih.gov/10679306/)
29. Banmeyer I, Marchand C, Clippe A, Knoops B. Human mitochondrial peroxiredoxin 5 protects from mitochondrial DNA damages induced by hydrogen peroxide. *FEBS Lett* 2005 579; 2327–2333. PMID: [15848167](https://pubmed.ncbi.nlm.nih.gov/15848167/)
30. Li N, Brun T, Cnop M, Cunha DA, Eizirik DL, Maechler P. Transient oxidative stress damages mitochondrial machinery inducing persistent beta-cell dysfunction. *J Biol Chem* 2009 284; 23602–23612. doi: [10.1074/jbc.M109.024323](https://doi.org/10.1074/jbc.M109.024323) PMID: [19546218](https://pubmed.ncbi.nlm.nih.gov/19546218/)
31. Fan GC, Chu G, Mitton B, Song Q, Yuan Q, Kranias EG. Small heat-shock protein Hsp20 phosphorylation inhibits beta-agonist-induced cardiac apoptosis. *Circ Res* 2004 94; 1474–1482. PMID: [15105294](https://pubmed.ncbi.nlm.nih.gov/15105294/)
32. Fan GC, Ren X, Qian J, Yuan Q, Nicolaou P, Wang Y, et al. Novel cardioprotective role of a small heat-shock protein, Hsp20, against ischemia/reperfusion injury. *Circulation* 2005 111; 1792–1799. PMID: [15809372](https://pubmed.ncbi.nlm.nih.gov/15809372/)
33. Qian J, Vafiadaki E, Florea SM, Singh VP, Song W, Lam CK, et al. Small heat shock protein 20 interacts with protein phosphatase-1 and enhances sarcoplasmic reticulum calcium cycling. *Circ Res* 2011 108; 1429–1438. doi: [10.1161/CIRCRESAHA.110.237644](https://doi.org/10.1161/CIRCRESAHA.110.237644) PMID: [21493896](https://pubmed.ncbi.nlm.nih.gov/21493896/)
34. Faulkner G, Pallavicini A, Formentin E, Comelli A, Ievolella C, Trevisan S, et al. ZASP: a new Z-band alternatively spliced PDZ-motif protein. *J Cell Biol* 1999 146; 465–475. PMID: [10427098](https://pubmed.ncbi.nlm.nih.gov/10427098/)
35. Li Z, Ai T, Samani K, Xi Y, Tzeng HP, Xie M, et al. A ZASP missense mutation, S196L, leads to cytoskeletal and electrical abnormalities in a mouse model of cardiomyopathy. *Circ Arrhythm Electrophysiol* 2010 3; 646–656. doi: [10.1161/CIRCEP.109.929240](https://doi.org/10.1161/CIRCEP.109.929240) PMID: [20852297](https://pubmed.ncbi.nlm.nih.gov/20852297/)
36. Vatta M, Mohapatra B, Jimenez S, Sanchez X, Faulkner G, Perles Z, et al. Mutations in Cypher/ZASP in patients with dilated cardiomyopathy and left ventricular non-compaction. *J Am Coll Cardiol* 2003 42; 2014–2027. PMID: [14662268](https://pubmed.ncbi.nlm.nih.gov/14662268/)
37. van Eldik W, Beqqali A, Monshouwer-Kloots J, Mummery C, Passier R. Cytoskeletal heart-enriched actin-associated protein (CHAP) is expressed in striated and smooth muscle cells in chick and mouse during embryonic and adult stages. *Int J Dev Biol* 2011 55; 649–655. doi: [10.1387/ijdb.103207wv](https://doi.org/10.1387/ijdb.103207wv) PMID: [21948713](https://pubmed.ncbi.nlm.nih.gov/21948713/)
38. Beqqali A, Monshouwer-Kloots J, Monteiro R, Welling M, Bakkens J, Ehler E, et al. CHAP is a newly identified Z-disc protein essential for heart and skeletal muscle function. *J Cell Sci* 2010 123; 1141–1150. doi: [10.1242/jcs.063859](https://doi.org/10.1242/jcs.063859) PMID: [20215401](https://pubmed.ncbi.nlm.nih.gov/20215401/)
39. Heit C, Jackson BC, McAndrews M, Wright MW, Thompson DC, Silverman GA, et al. Update of the human and mouse SERPIN gene superfamily. *Hum Genomics* 2013 7; 22. doi: [10.1186/1479-7364-7-22](https://doi.org/10.1186/1479-7364-7-22) PMID: [24172014](https://pubmed.ncbi.nlm.nih.gov/24172014/)
40. Wang D, Wang W, Dawkins P, Paterson T, Kalsheker N, Sallenave JM, et al. Deletion of Serpina1a, a murine alpha1-antitrypsin ortholog, results in embryonic lethality. *Exp Lung Res* 2011 37; 291–300. doi: [10.3109/01902148.2011.554599](https://doi.org/10.3109/01902148.2011.554599) PMID: [21574874](https://pubmed.ncbi.nlm.nih.gov/21574874/)
41. Talmud PJ, Martin S, Steiner G, Flavell DM, Whitehouse DB, Nagl S, et al. Progression of atherosclerosis is associated with variation in the alpha1-antitrypsin gene. *Arterioscler Thromb Vasc Biol* 2003 23; 644–649. PMID: [12692006](https://pubmed.ncbi.nlm.nih.gov/12692006/)

42. Borisov AB, Kontogianni-Konstantopoulos A, Bloch RJ, Westfall MV, Russell MW. Dynamics of obscurin localization during differentiation and remodeling of cardiac myocytes: obscurin as an integrator of myofibrillar structure. *J Histochem Cytochem* 2004 52; 1117–1127. PMID: [15314079](#)
43. Makarenko I, Opitz CA, Leake MC, Neagoe C, Kulke M, Gwathmey JK, et al. Passive stiffness changes caused by upregulation of compliant titin isoforms in human dilated cardiomyopathy hearts. *Circ Res* 2004 95; 708–716. PMID: [15345656](#)
44. Arimura T, Matsumoto Y, Okazaki O, Hayashi T, Takahashi M, Inagaki N, et al. Structural analysis of obscurin gene in hypertrophic cardiomyopathy. *Biochem Biophys Res Commun* 2007 362; 281–287. PMID: [17716621](#)
45. Mahley RW. Apolipoprotein E: cholesterol transport protein with expanding role in cell biology. *Science* 1988 240; 622–630. PMID: [3283935](#)
46. Nakashima Y, Plump AS, Raines EW, Breslow JL, Ross R. ApoE-deficient mice develop lesions of all phases of atherosclerosis throughout the arterial tree. *Arterioscler Thromb* 1994 14; 133–140. PMID: [8274468](#)
47. Stewart FA, Heeneman S, Te Poele J, Kruse J, Russell NS, Gijbels M, et al. Ionizing radiation accelerates the development of atherosclerotic lesions in ApoE<sup>-/-</sup> mice and predisposes to an inflammatory plaque phenotype prone to hemorrhage. *Am J Pathol* 2006 168; 649–658. PMID: [16436678](#)
48. Dan I, Watanabe NM, Kusumi A. The Ste20 group kinases as regulators of MAP kinase cascades. *Trends Cell Biol* 2001 11; 220–230. PMID: [11316611](#)
49. Zhang SX, Garcia-Gras E, Wycuff DR, Marriot SJ, Kadeer N, Yu W, et al. Identification of direct serum-response factor gene targets during Me2SO-induced P19 cardiac cell differentiation. *J Biol Chem* 2005 280; 19115–19126. PMID: [15699019](#)
50. Fuller SJ, Osborne SA, Leonard SJ, Hardyman MA, Vaniotis G, Allen BG, et al. Cardiac protein kinases: the cardiomyocyte kinome and differential kinase expression in human failing hearts. *Cardiovasc Res* 2015 108; 87–98. doi: [10.1093/cvr/cvv210](#) PMID: [26260799](#)
51. Aouadi M, Tesz GJ, Nicoloso SM, Wang M, Chouinard M, Soto E, et al. Orally delivered siRNA targeting macrophage Map4k4 suppresses systemic inflammation. *Nature* 2009 458; 1180–1184. doi: [10.1038/nature07774](#) PMID: [19407801](#)
52. Kempf SJ, Sepe S, von Toerne C, Janik D, Neff F, Hauck SM, et al. Neonatal Irradiation Leads to Persistent Proteome Alterations Involved in Synaptic Plasticity in the Mouse Hippocampus and Cortex. *J Proteome Res* 2015.
