# Supplementary material for: In-Utero Low-Dose Irradiation Leads to Persistent Alterations in the Mouse Heart Proteome
Source: PLOS journal article supplement (doi:10.1371/journal.pone.0156952), 2016-06-08

## Supplementary figures

Figure A. Images from immunoblotting of APOE and ATP synthase  $\beta$  in control and 1.0 Gy irradiated heart lysates at 6 months and 2 years.

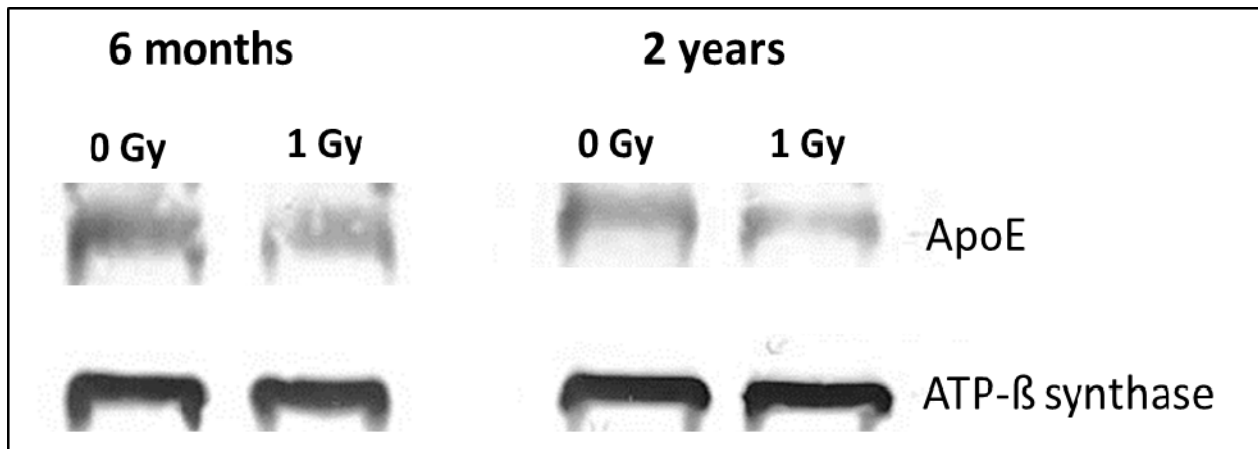

Figure B. Images from immunoblotting of PRDX5 and ATP synthase  $\beta$  in control and 1.0 Gy irradiated heart lysates at 6 months and 2 years.

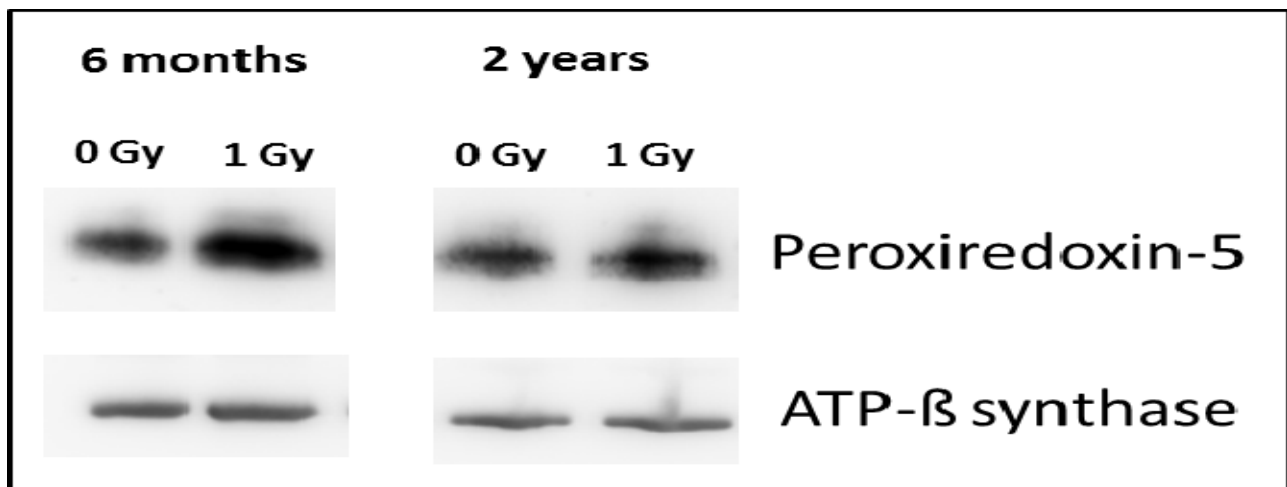

**Figure C. Images from immunoblotting of LDB3 and ATP synthase  $\beta$  in control and 1.0 Gy irradiated heart lysates at 6 months and 2 years.**

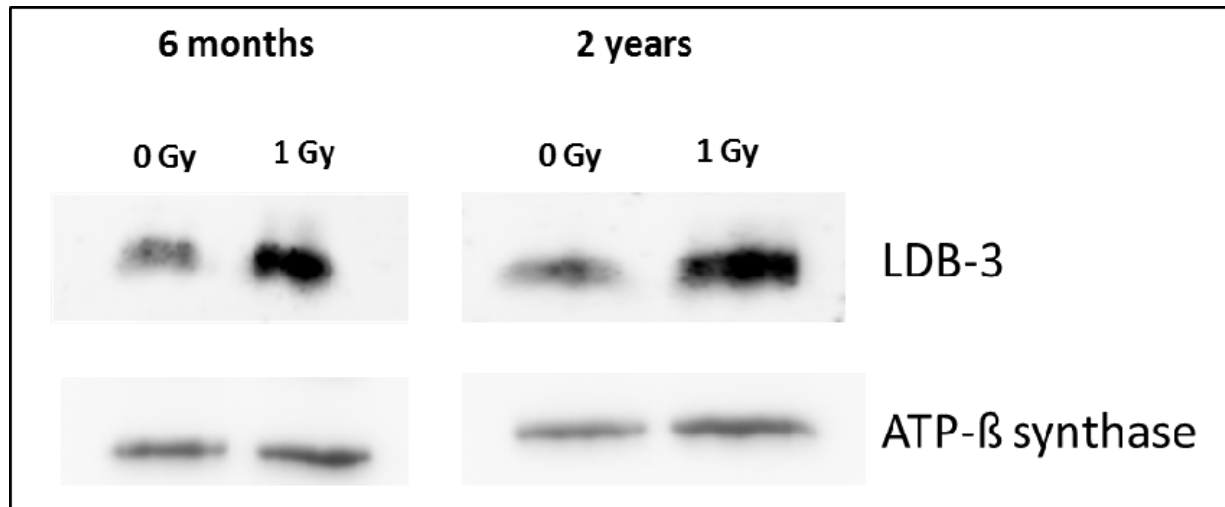

**Figure D. Images from immunoblotting of phospho-MAP4K4 (Ser-801), vimentin and ATP synthase  $\beta$  in control and 1.0 Gy irradiated heart lysates at 6 months and 2 years.**

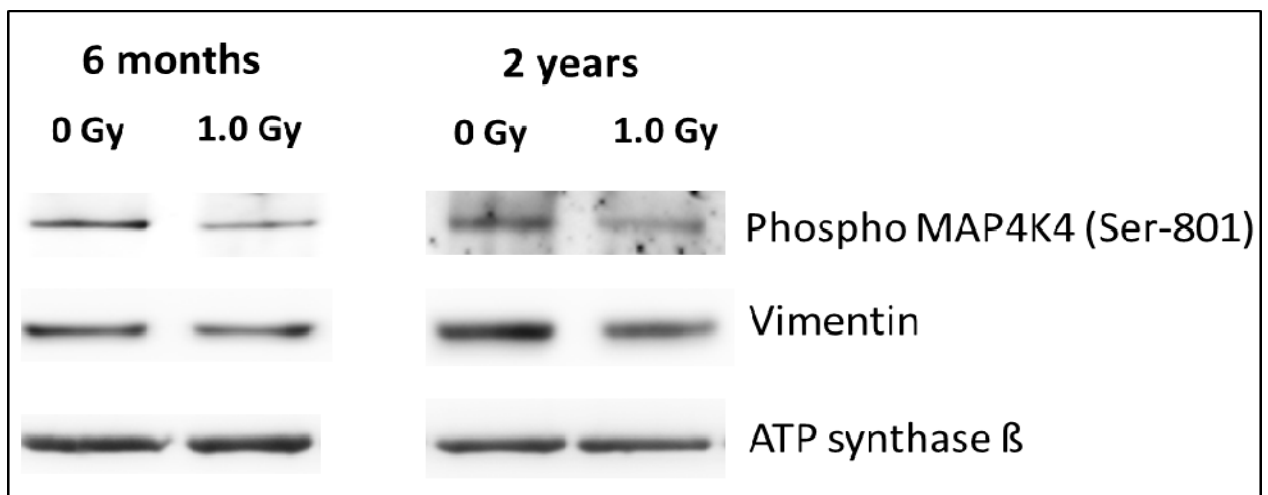

Supplement: S1 (10.1371/journal.pone.0156952.s001) [file journal.pone.0156952.s001.PDF › journal.pone.0156952.s001.PDF]
