# Supplementary material for: In-Utero Low-Dose Irradiation Leads to Persistent Alterations in the Mouse Heart Proteome
Source: PLOS journal article supplement (doi:10.1371/journal.pone.0156952), 2016-06-08
Supplement: S2 (10.1371/journal.pone.0156952.s002) [file journal.pone.0156952.s002.PDF › journal.pone.0156952.s002.PDF]

# Supplementary tables

**Table A. Significantly deregulated proteins at 0.02 Gy, 6 months.**

| ENSEMBL ID         | Symbol    | Protein name                                      | Unique Peptides | Fold changes | Variability [%] |
|--------------------|-----------|---------------------------------------------------|-----------------|--------------|-----------------|
| ENSMUSP00000046497 | ACAD12    | Acyl-Coenzyme A dehydrogenase family, member 12   | 4               | 1,643        | 0,7             |
| ENSMUSP00000022328 | LDB3      | LIM domain binding 3                              | 4               | 1,524        | 4,1             |
| ENSMUSP00000080584 | MYH13     | Myosin, heavy polypeptide 13, skeletal muscle     | 2               | 1,439        | 16,6            |
| ENSMUSP00000033049 | COX6A2    | Cytochrome c oxidase, subunit VI a, polypeptide 2 | 2               | 1,377        | 3,1             |
| ENSMUSP00000087192 | BDH1      | 3-hydroxybutyrate dehydrogenase, type 1           | 8               | 0,761        | 6,6             |
| ENSMUSP00000026576 | TALDO1    | Transaldolase 1                                   | 2               | 0,753        | 6,9             |
| ENSMUSP00000125636 | CYB5R3    | Cytochrome b5 reductase 3                         | 3               | 0,749        | 5,2             |
| ENSMUSP00000035158 | TRF       | Transferrin                                       | 10              | 0,746        | 3,2             |
| ENSMUSP00000037206 | FKBP      | FK506 binding protein 1a                          | 4               | 0,732        | 17,9            |
| ENSMUSP00000121961 | RPS5      | Ribosomal protein S5                              | 6               | 0,732        | 13,0            |
| ENSMUSP00000099461 | DSTN      | Destrin                                           | 3               | 0,730        | 20,5            |
| ENSMUSP00000100924 | DCN       | Decorin                                           | 6               | 0,719        | 11,6            |
| ENSMUSP00000082132 | SERPINA1A | Serine peptidase inhibitor, clade A, member 1A    | 4               | 0,697        | 10,8            |
| ENSMUSP00000034588 | APOA1     | Apolipoprotein A-I                                | 8               | 0,689        | 23,5            |
| ENSMUSP00000033741 | BGN       | Biglycan                                          | 5               | 0,676        | 16,4            |
| ENSMUSP00000104108 | RTN2      | Reticulon 2                                       | 2               | 0,662        | 12,2            |
| ENSMUSP00000031314 | ALB       | Albumin                                           | 11              | 0,632        | 10,9            |
| ENSMUSP00000034053 | PDLIM3    | PDZ and LIM domain 3                              | 2               | 0,617        | 13,5            |
| ENSMUSP00000130377 | COL1A2    | Collagen, type I, alpha 2                         | 2               | 0,501        | 15,3            |

**Table B. Significantly deregulated proteins at 0.1 Gy, 6 months.**

| ENSEMBL ID         | Symbol    | Protein                                                     | Unique Peptides | Fold changes | Variability [%] |
|--------------------|-----------|-------------------------------------------------------------|-----------------|--------------|-----------------|
| ENSMUSP00000022328 | LDB3      | LIM domain binding 3                                        | 4               | 2,300        | 10,1            |
| ENSMUSP00000042095 | SERPINA3K | Serine (or cysteine) peptidase inhibitor                    | 3               | 2,260        | 26,9            |
| ENSMUSP00000033049 | COX6A2    | Cytochrome c oxidase, subunit VI a,                         | 2               | 2,095        | 12,8            |
| ENSMUSP00000027766 | ADCK3     | AarF domain containing kinase 3                             | 4               | 1,867        | 4,2             |
| ENSMUSP00000134521 | PRDX5     | Peroxiredoxin 5                                             | 2               | 1,862        | 11,1            |
| ENSMUSP00000001242 | D10JHU    | DNA segment, Chr 10, Johns Hopkins University               | 3               | 1,781        | 12,1            |
| ENSMUSP00000043501 | HRC       | Histidine rich calcium binding protein                      | 12              | 1,756        | 10,3            |
| ENSMUSP00000080994 | MT-CO2    | Mitochondrially encoded cytochrome c oxidase II             | 4               | 1,604        | 17,6            |
| ENSMUSP00000026743 | UQCRC1    | Ubiquinol-cytochrome c reductase core protein 1             | 17              | 1,574        | 17,5            |
| ENSMUSP00000125939 | PCCB      | Propionyl Coenzyme A carboxylase, beta polypeptide          | 7               | 1,546        | 6,5             |
| ENSMUSP00000039507 | MACROD1   | MACRO domain containing 1                                   | 8               | 1,541        | 17,8            |
| ENSMUSP00000037348 | ACAA2     | Acetyl-Coenzyme A acyltransferase 2                         | 8               | 1,439        | 5,7             |
| ENSMUSP00000001304 | CKB       | Creatine kinase                                             | 6               | 1,428        | 18,7            |
| ENSMUSP00000032887 | COQ7      | Demethyl-Q 7                                                | 4               | 1,419        | 26,6            |
| ENSMUSP00000002452 | NDUFA11   | NADH dehydrogenase (ubiquinone) 1 alpha subcomplex 11       | 3               | 1,385        | 11,2            |
| ENSMUSP00000019037 | MB        | Myoglobin                                                   | 2               | 1,381        | 12,1            |
| ENSMUSP00000009256 | BCL2L13   | BCL2-like 13 (apoptosis facilitator)                        | 2               | 1,365        | 6,6             |
| ENSMUSP00000029610 | HADH      | Hydroxyacyl-Coenzyme A dehydrogenase                        | 2               | 1,365        | 16,0            |
| ENSMUSP00000122103 | SLC25A12  | Solute carrier family 25 (mitochondrial carrier, Aralar)    | 14              | 1,349        | 20,6            |
| ENSMUSP00000070709 | FABP3     | Fatty acid binding protein 3, muscle and heart              | 3               | 1,348        | 7,3             |
| ENSMUSP00000123100 | ATP5C1    | ATP synthase, H <sup>+</sup> transporting, mitochondrial F1 | 3               | 0,756        | 15,5            |
| ENSMUSP00000051570 | SYNPO2    | Synaptopodin 2                                              | 4               | 0,743        | 10,0            |
| ENSMUSP00000026625 | CLYBL     | Citrate lyase beta                                          | 5               | 0,732        | 6,4             |
| ENSMUSP00000035158 | TRF       | Transferrin                                                 | 10              | 0,728        | 4,3             |
| ENSMUSP00000031314 | ALB       | Albumin                                                     | 11              | 0,701        | 3,3             |
| ENSMUSP00000100924 | DCN       | Decorin                                                     | 6               | 0,695        | 18,4            |

|                    |       |                          |   |       |      |
|--------------------|-------|--------------------------|---|-------|------|
| ENSMUSP00000034588 | APOA1 | Apolipoprotein A-I       | 8 | 0,689 | 4,2  |
| ENSMUSP00000099461 | DSTN  | Dextrin                  | 3 | 0,685 | 9,7  |
| ENSMUSP00000106602 | YWHAQ | Tyrosine 3-monooxygenase | 2 | 0,612 | 15,8 |

**Table C. Significantly deregulated proteins at 1.0 Gy dose, 6 months.**

| ENSEMBL ID          | Symbol    | Protein                                                                | Unique Peptides | Fold changes | Variability [%] |
|---------------------|-----------|------------------------------------------------------------------------|-----------------|--------------|-----------------|
| ENSMUSP00000039172  | HSPB6     | Heat shock protein, alpha-crystallin-related, B6                       | 5               | 2,344        | 25,3            |
| ENSMUSP00000022328  | LDB3      | LIM domain binding 3                                                   | 4               | 2,197        | 22,2            |
| ENSMUSP00000084509  | FN1       | Fibronectin 1                                                          | 9               | 2,159        | 30,6            |
| ENSMUSP00000034453  | ACTA1     | Actin, alpha 1, skeletal muscle                                        | 2               | 2,104        | 20,7            |
| ENSMUSP00000082132  | SERPINA1A | Serine (or cysteine) peptidase inhibitor, clade A                      | 4               | 1,946        | 4,4             |
| ENSMUSP00000042095  | SERPINA3K | Serine (or cysteine) peptidase inhibitor, clade A, member 3K           | 3               | 1,944        | 21,4            |
| ENSMUSP000000134521 | PRDX5     | Peroxiredoxin 5                                                        | 1               | 1,790        | 15,1            |
| ENSMUSP00000043501  | HRC       | Histidine rich calcium binding protein                                 | 15              | 1,659        | 13,4            |
| ENSMUSP00000029610  | HADH      | Hydroxyacyl-Coenzyme A dehydrogenase                                   | 2               | 1,583        | 4,4             |
| ENSMUSP00000027766  | ADCK3     | ArF domain containing kinase 3                                         | 4               | 1,551        | 3,7             |
| ENSMUSP00000037348  | ACAA2     | Acetyl-Coenzyme A acyltransferase 2                                    | 9               | 1,533        | 12,2            |
| ENSMUSP00000039507  | MACROD1   | MACRO domain containing 1                                              | 7               | 1,500        | 18,6            |
| ENSMUSP00000026743  | UQCRC1    | Ubiquinol-cytochrome c reductase core protein 1                        | 15              | 1,456        | 6,1             |
| ENSMUSP00000031038  | OCAID1    | OCIA domain containing 1                                               | 2               | 1,428        | 6,6             |
| ENSMUSP000000121557 | NDUFV2    | NADH dehydrogenase (ubiquinone) flavoprotein 2                         | 7               | 1,355        | 23,2            |
| ENSMUSP00000009256  | BCL2L13   | BCL2-like 13 (apoptosis facilitator)                                   | 2               | 1,349        | 26,4            |
| ENSMUSP00000098405  | ANXA7     | Annexin A7                                                             | 5               | 1,343        | 30,2            |
| ENSMUSP00000025961  | PRDX3     | Peroxiredoxin 3                                                        | 3               | 1,339        | 27,4            |
| ENSMUSP00000090672  | MYH7B     | Myosin, heavy chain 7B, cardiac muscle, beta                           | 2               | 1,338        | 29,1            |
| ENSMUSP00000093101  | SERPINA1B | Serine (or cysteine) peptidase inhibitor, clade A, member 1B           | 3               | 1,338        | 0,2             |
| ENSMUSP000000104830 | UBE2V1    | Ubiquitin-conjugating enzyme E2 variant 1                              | 3               | 0,768        | 2,7             |
| ENSMUSP00000022894  | YWHAZ     | Tyrosine 3-monooxygenase/tryptophan 5-monooxygenase activation protein | 2               | 0,767        | 3,5             |
| ENSMUSP000000129233 | VIM       | Vimentin                                                               | 24              | 0,755        | 10,6            |
| ENSMUSP00000031314  | ALB       | Albumin                                                                | 11              | 0,753        | 7,2             |
| ENSMUSP00000088372  | GM10166   | Predicted pseudogene                                                   | 6               | 0,736        | 4,5             |

|                     |        |                                                     |    |       |      |
|---------------------|--------|-----------------------------------------------------|----|-------|------|
| ENSMUSP00000015829  | ACADSB | Acyl-Coenzyme A dehydrogenase, short/branched chain | 2  | 0,734 | 3,2  |
| ENSMUSP00000033741  | BGN    | Biglycan                                            | 3  | 0,721 | 1,0  |
| ENSMUSP000000106859 | TAGLN2 | Transgelin 2                                        | 4  | 0,711 | 17,5 |
| ENSMUSP000000099461 | DSTN   | Destrin                                             | 4  | 0,701 | 7,7  |
| ENSMUSP000000100924 | DCN    | Decorin                                             | 5  | 0,686 | 13,4 |
| ENSMUSP00000003066  | APOE   | Apolipoprotein E                                    | 5  | 0,644 | 17,9 |
| ENSMUSP000000034053 | PDLIM3 | PDZ and LIM domain 3                                | 2  | 0,636 | 16,1 |
| ENSMUSP000000125164 | GPD1   | Glycerol-3-phosphate dehydrogenase 1 (soluble)      | 3  | 0,456 | 27,7 |
| ENSMUSP000000052872 | FASN   | Fatty acid synthase                                 | 19 | 0,297 | 6,6  |

**Table D. Significantly deregulated proteins list at 0.05 Gy, 2 years.**

| ENSEMBL ID         | Symbol | Protein                                              | Unique Peptides | Fold changes | Variability [%] |
|--------------------|--------|------------------------------------------------------|-----------------|--------------|-----------------|
| ENSMUSP00000099938 | MDH1   | Malate dehydrogenase 1                               | 2               | 2,248        | 27,4            |
| ENSMUSP00000039172 | HSPB6  | Heat shock protein, alpha-crystallin-related, B6     | 5               | 2,168        | 29,2            |
| ENSMUSP00000028944 | ACSS1  | Acyl-CoA synthetase short-chain family member 1      | 11              | 1,503        | 4,5             |
| ENSMUSP00000131316 | HSPG2  | Perlecan (heparan sulfate proteoglycan 2)            | 53              | 1,379        | 26,3            |
| ENSMUSP00000022328 | LDB3   | LIM domain binding 3                                 | 5               | 1,368        | 7,7             |
| ENSMUSP00000037341 | NDUFB7 | NADH dehydrogenase (ubiquinone) 1 beta subcomplex, 7 | 6               | 1,353        | 21,6            |
| ENSMUSP00000034264 | PGLS   | 6-phosphogluconolactonase                            | 9               | 1,330        | 29,1            |
| ENSMUSP00000101898 | UBE2D3 | Ubiquitin-conjugating enzyme E2D                     | 2               | 0,737        | 5,0             |
| ENSMUSP00000117800 | GRHPR  | Glyoxylate reductase/hydroxypyruvate reductase       | 4               | 0,722        | 23,8            |
| ENSMUSP00000098314 | MECP2  | Methyl CpG binding protein 2                         | 3               | 0,719        | 30,4            |
| ENSMUSP00000135439 | ACAA1A | Acetyl-Coenzyme A acyltransferase 1A                 | 4               | 0,558        | 7,4             |

**Table E. Significantly deregulated proteins at 0.1 Gy, 2 years.**

| ENSEMBL ID          | Symbol   | Protein                                                        | Unique Peptides | Fold changes | Variability [%] |
|---------------------|----------|----------------------------------------------------------------|-----------------|--------------|-----------------|
| ENSMUSP00000039172  | HSPB6    | Heat shock protein, alpha-crystallin-related, B6               | 5               | 2,623        | 28,4            |
| ENSMUSP00000022328  | LDB3     | LIM domain binding 3                                           | 5               | 2,043        | 25,3            |
| ENSMUSP00000033049  | COX6A2   | Cytochrome c oxidase, subunit VI a, polypeptide 2              | 2               | 1,896        | 14,2            |
| ENSMUSP000000134521 | PRDX5    | Peroxiredoxin 5                                                | 2               | 1,861        | 1,3             |
| ENSMUSP00000026743  | UQCRC1   | Ubiquinol-cytochrome c reductase                               | 15              | 1,823        | 12,9            |
| ENSMUSP00000080994  | MT-CO2   | Mitochondrially encoded cytochrome c oxidase II                | 4               | 1,811        | 2,4             |
| ENSMUSP00000048218  | ACTA2    | Actin, alpha 2, smooth muscle, aorta                           | 6               | 1,792        | 21,3            |
| ENSMUSP00000002452  | NDUFA11  | NADH dehydrogenase (ubiquinone) 1 alpha subcomplex             | 3               | 1,714        | 28,4            |
| ENSMUSP000000131316 | HSPG2    | Perlecan (heparan sulfate proteoglycan 2)                      | 53              | 1,636        | 29,9            |
| ENSMUSP00000039507  | MACROD1  | MACRO domain containing 1                                      | 6               | 1,621        | 12,0            |
| ENSMUSP00000049737  | OBSCN    | Obscurin, cytoskeletal calmodulin and titin-interacting RhoGEF | 13              | 1,590        | 5,3             |
| ENSMUSP000000114107 | NDUFS6   | NADH dehydrogenase (ubiquinone) Fe-S protein 6                 | 2               | 1,587        | 9,8             |
| ENSMUSP000000132927 | COX5B    | Cytochrome c oxidase, subunit Vb                               | 4               | 1,509        | 20,3            |
| ENSMUSP00000015256  | SLC25A13 | Solute carrier family 25, member 13                            | 7               | 1,478        | 3,9             |
| ENSMUSP00000034264  | PGLS     | 6-phosphogluconolactonase                                      | 9               | 1,430        | 18,2            |
| ENSMUSP000000126699 | GLOD4    | Glyoxalase domain containing 4                                 | 2               | 1,398        | 26,8            |
| ENSMUSP00000039472  | FGB      | Fibrinogen beta chain                                          | 6               | 1,383        | 18,4            |
| ENSMUSP00000008280  | FHL2     | Four and a half LIM domains 2                                  | 4               | 1,381        | 7,9             |
| ENSMUSP00000037348  | ACAA2    | Acetyl-Coenzyme A acyltransferase 2                            | 9               | 1,342        | 13,1            |
| ENSMUSP000000103402 | TOMD1    | Tropomodulin 1                                                 | 3               | 1,337        | 5,9             |
| ENSMUSP00000025511  | RPS14    | Ribosomal protein S14                                          | 3               | 0,767        | 9,5             |
| ENSMUSP00000088349  | SELENBP1 | Selenium binding protein 1                                     | 7               | 0,753        | 8,5             |
| ENSMUSP00000039110  | SERPBI   | Serpine1 mRNA binding protein 1                                | 2               | 0,751        | 2,9             |
| ENSMUSP00000038763  | PCCA     | Propionyl-Coenzyme A carboxylase, alpha polypeptide            | 5               | 0,744        | 4,0             |
| ENSMUSP000000114649 | MRPL15   | Mitochondrial ribosomal protein L15                            | 5               | 0,719        | 9,4             |
| ENSMUSP000000135439 | ACAA1A   | Acetyl-Coenzyme A acyltransferase 1A                           | 4               | 0,588        | 7,8             |

**Table F. Significantly deregulated proteins at 1.0 Gy, 2 years.**

| ENSEMBL ID         | Symbol   | Protein                                               | Unique Peptides | Fold changes | Variability [%] |
|--------------------|----------|-------------------------------------------------------|-----------------|--------------|-----------------|
| ENSMUSP00000007130 | CTNNB1   | Catenin (cadherin associated protein), beta 1         | 4               | 5,328        | 23,3            |
| ENSMUSP00000127435 | SUCLG2   | Succinate-Coenzyme A ligase, GDP-forming              | 3               | 4,316        | 24,9            |
| ENSMUSP00000039172 | HSPB6    | Heat shock protein, alpha-crystallin-related, B6      | 7               | 3,701        | 19,8            |
| ENSMUSP00000111516 | CDH2     | Cadherin 2                                            | 5               | 3,301        | 9,5             |
| ENSMUSP00000022328 | LDB3     | LIM domain binding 3                                  | 6               | 2,468        | 12,7            |
| ENSMUSP00000002452 | NDUFA11  | NADH dehydrogenase (ubiquinone) 1 alpha subcomplex 11 | 3               | 2,277        | 28,6            |
| ENSMUSP00000014080 | MYL2     | Myosin, light polypeptide 2, regulatory, cardiac      | 2               | 2,224        | 17,9            |
| ENSMUSP00000080994 | MT-CO2   | Mitochondrially encoded cytochrome c oxidase II       | 4               | 2,164        | 13,3            |
| ENSMUSP00000118601 | HK1      | Hexokinase 1                                          | 5               | 2,113        | 9,5             |
| ENSMUSP00000134521 | PRDX5    | Peroxisomal oxidoreductin 5                           | 2               | 2,086        | 12,8            |
| ENSMUSP00000026743 | UQCRC1   | Ubiquinol-cytochrome c reductase core protein 1       | 20              | 2,074        | 7,5             |
| ENSMUSP00000106859 | TAGLN2   | Transgelin 2                                          | 3               | 1,994        | 24,1            |
| ENSMUSP00000112760 | SYNPO2L  | Synaptopodin 2-like                                   | 11              | 1,928        | 16,8            |
| ENSMUSP00000023583 | AHSG     | Alpha-2-HS-glycoprotein                               | 2               | 1,915        | 20,5            |
| ENSMUSP00000114107 | NDUFS6   | NADH dehydrogenase (ubiquinone) Fe-S protein 6        | 2               | 1,834        | 22,7            |
| ENSMUSP00000039507 | MACROD1  | MACRO domain containing 1                             | 6               | 1,746        | 11,7            |
| ENSMUSP00000029610 | HADH     | Hydroxyacyl-Coenzyme A dehydrogenase                  | 2               | 1,721        | 2,7             |
| ENSMUSP00000042374 | HSPB2    | Heat shock protein 2                                  | 6               | 1,710        | 28,8            |
| ENSMUSP00000129776 | HRC      | Histidine rich calcium binding protein                | 18              | 1,706        | 19,4            |
| ENSMUSP00000122103 | SLC25A12 | Solute carrier family 25 (Aralar), member 12          | 16              | 1,682        | 26,4            |
| ENSMUSP00000071486 | ACTG1    | Actin, gamma, cytoplasmic 1                           | 3               | 1,653        | 8,2             |
| ENSMUSP00000026289 | HSD17B10 | Hydroxysteroid (17-beta) dehydrogenase 10             | 5               | 1,611        | 18,3            |
| ENSMUSP00000116919 | VDAC1    | Voltage-dependent anion channel 1                     | 2               | 1,606        | 27,7            |
| ENSMUSP00000048803 | PRELP    | Proline arginine-rich end leucine-rich repeat         | 6               | 1,578        | 14,0            |
| ENSMUSP00000074600 | NDUFS8   | NADH dehydrogenase (ubiquinone) Fe-S protein 8        | 6               | 1,564        | 10,8            |
| ENSMUSP00000131316 | HSPG2    | Perlecan (heparan sulfate proteoglycan 2)             | 61              | 1,484        | 21,8            |



|                    |          |                                                           |    |       |      |
|--------------------|----------|-----------------------------------------------------------|----|-------|------|
| ENSMUSP00000029266 | ANAXA5   | Annexin A5                                                | 7  | 1,480 | 31,0 |
| ENSMUSP00000121557 | NDUFV2   | NADH dehydrogenase (ubiquinone) flavoprotein 2            | 7  | 1,432 | 9,4  |
| ENSMUSP00000011896 | PAGM1    | Phosphoglycerate mutase 1                                 | 7  | 1,406 | 8,1  |
| ENSMUSP00000034264 | PGLS     | 6-phosphogluconolactonase                                 | 8  | 1,385 | 13,1 |
| ENSMUSP00000038763 | PCCA     | Propionyl-Coenzyme A carboxylase, alpha polypeptide       | 8  | 0,763 | 16,2 |
| ENSMUSP00000008826 | RPL10    | Ribosomal protein 10                                      | 9  | 0,754 | 29,1 |
| ENSMUSP00000101898 | UBE2D3   | Ubiquitin-conjugating enzyme E2D 3                        | 3  | 0,754 | 10,7 |
| ENSMUSP00000106342 | GDI2     | Guanosine diphosphate (GDP) dissociation inhibitor 2      | 2  | 0,749 | 12,1 |
| ENSMUSP00000039110 | SERPBI   | Serpine1 mRNA binding protein 1                           | 2  | 0,746 | 6,1  |
| ENSMUSP00000088349 | SELENBP1 | Selenium binding protein 1                                | 8  | 0,745 | 14,9 |
| ENSMUSP00000129233 | VIM      | Vimentin                                                  | 20 | 0,645 | 17,6 |
| ENSMUSP00000028694 | PACSIN3  | Protein kinase C and casein kinase substrate in neurons 3 | 7  | 0,649 | 24,5 |
| ENSMUSP00000135439 | ACAA1A   | Acetyl-Coenzyme A acyltransferase 1A                      | 5  | 0,585 | 5,2  |
| ENSMUSP00000003066 | APOE     | Apolipoprotein E                                          | 8  | 0,479 | 12,4 |
| ENSMUSP00000037206 | FKBP1A   | FK506 binding protein 1a                                  | 3  | 0,271 | 27,0 |
